# Professional Practice Committee for the 2013 Clinical Practice Recommendations

Committee members disclosed the following financial or other conflicts of interest covering the period 1 November 2011–31 October 2012.

| Member                                    | Employment                                                                                                                                                                  | Research grant                                                                                                                                   | Other research support                                                                 |
|-------------------------------------------|-----------------------------------------------------------------------------------------------------------------------------------------------------------------------------|--------------------------------------------------------------------------------------------------------------------------------------------------|----------------------------------------------------------------------------------------|
| Roger Austin, MS, RPH, CDE                | Henry Ford Health System, Sterling Heights, MI                                                                                                                              | None                                                                                                                                             | None                                                                                   |
| Nathaniel G. Clark, MD, RD                | Diabetes Center of Cape Cod, Hyannis, MA                                                                                                                                    | None                                                                                                                                             | None                                                                                   |
| Cyrus V. Desouza, MD                      | University of Nebraska Medical Center and Omaha VA Medical Center, Omaha, NE                                                                                                | REATA Research Trial#, Novo Nordisk#                                                                                                             | None                                                                                   |
| Martha Funnell, MSN, RN, CDE              | University of Michigan, Ann Arbor, MI                                                                                                                                       | None                                                                                                                                             | None                                                                                   |
| Allison B. Goldfine, MD                   | Joslin Diabetes Center, Boston, MA                                                                                                                                          | NIDDK#, NHLBI#                                                                                                                                   | Research supplies from Caraco Pharmaceuticals#, LifeScan#, Mercodia#, Nestle#, Amneal# |
| Richard Grant, MD, MPH                    | Division of Research, Kaiser Permanente, Oakland, CA                                                                                                                        | AHRQ#, NIDDK#                                                                                                                                    | None                                                                                   |
| James Lenhard, MD                         | Christiana Care Health System, Wilmington, DE                                                                                                                               | NIH#                                                                                                                                             | None                                                                                   |
| Jennifer B. Marks, MD                     | VA Diabetes Management Team, Miami, FL, and Diabetes Research Institute, University of Miami School of Medicine, Miami, FL                                                  | Lilly#, NIH#, Leona M. and Harry B. Helmsley Charitable Trust (T1D Exchange Clinic Registry)#                                                    | NIDDK                                                                                  |
| Anthony L. McCall, MD, PhD                | University of Virginia, Charlottesville, VA                                                                                                                                 | Aventis#, Eli Lilly#, NIDDK                                                                                                                      | None                                                                                   |
| Janis R. McWilliams, RN, MSN, CDE, BC-ADM | Consultant, Pittsburgh, PA                                                                                                                                                  | None                                                                                                                                             | None                                                                                   |
| R. Harsha Rao, MD                         | University of Pittsburgh Medical Center, Pittsburgh, PA, and VA Pittsburgh Healthcare System, Pittsburgh, PA                                                                | None                                                                                                                                             | None                                                                                   |
| Andrew Rhinehart, MD, CDE, BC-ADM, FACP   | Mountain States Health Alliance, Abingdon, VA                                                                                                                               | Diabetes Impact Grant#, Health Wagon Grant#                                                                                                      | None                                                                                   |
| Henry Rodriguez, MD                       | University of South Florida, Tampa, FL                                                                                                                                      | NIH#, Bristol-Myers Squibb#, Daiichi Sankyo#, Novartis#, Merck#, Leona M. and Harry B. Helmsley Charitable Trust (T1D Exchange Clinic Registry)# | None                                                                                   |
| Debra L. Simmons, MD, MS                  | University of Utah, VA Salt Lake City, Salt Lake City, UT, and University of Arkansas for Medical Sciences and Central Arkansas Veterans Healthcare System, Little Rock, AR | NHLBI#, Novo Nordisk#                                                                                                                            | None                                                                                   |
| Patricia Urbanski, MEd, RD, LD, CDE       | Consultant, Cloquet, MN                                                                                                                                                     | None                                                                                                                                             | None                                                                                   |
| Carol Wysham, MD (Chair)                  | Rockwood Clinic, Spokane, WA                                                                                                                                                | NIH#, Leona M. and Harry B. Helmsley Charitable Trust (T1D Exchange Clinic Registry)#                                                            | None                                                                                   |
| Judy Fradkin, MD (Ex officio)             | NIDDK, Bethesda, MD                                                                                                                                                         | None                                                                                                                                             | None                                                                                   |
| Stephanie Dunbar, RD, MPH (Staff)         | American Diabetes Association, Alexandria, VA                                                                                                                               | None                                                                                                                                             | None                                                                                   |
| Sue Kirkman, MD (Staff)                   | American Diabetes Association, Alexandria, VA                                                                                                                               | None                                                                                                                                             | None                                                                                   |

\*≥\$10,000 per year from company to individual; #grant or contract is to university or other employer.

| Member | Speakers' bureau/honoraria                                                                                                         | Ownership interest                                                                                                                                                                                                                                                                                                       | Consultant/advisory board                                                                                                                                                                                                                                                                                                    | Other                                                                                                                                             |
|--------|------------------------------------------------------------------------------------------------------------------------------------|--------------------------------------------------------------------------------------------------------------------------------------------------------------------------------------------------------------------------------------------------------------------------------------------------------------------------|------------------------------------------------------------------------------------------------------------------------------------------------------------------------------------------------------------------------------------------------------------------------------------------------------------------------------|---------------------------------------------------------------------------------------------------------------------------------------------------|
| R.A.   | Johnson & Johnson<br>Diabetes Institute<br>(wife Mary Austin)                                                                      | None                                                                                                                                                                                                                                                                                                                     | None                                                                                                                                                                                                                                                                                                                         | None                                                                                                                                              |
| N.G.C. | Novo Nordisk, Amylin                                                                                                               | None                                                                                                                                                                                                                                                                                                                     | None                                                                                                                                                                                                                                                                                                                         | <i>Clinical Diabetes</i> , Editorial Board                                                                                                        |
| C.V.D. | None                                                                                                                               | None                                                                                                                                                                                                                                                                                                                     | Novo Nordisk, Takeda                                                                                                                                                                                                                                                                                                         | None                                                                                                                                              |
| M.F.   | None                                                                                                                               | None                                                                                                                                                                                                                                                                                                                     | Eli Lilly, Boehringer Ingelheim,<br>Halozyne Therapeutics,<br>Merck Pharmaceutical,<br>Bristol-Myers Squibb/<br>AstraZeneca, UCLA<br>Center for Health Policy<br>Research, Animas/LifeScan<br>Glucose Meter, Bristol-<br>Myers Squibb Nurse<br>Practitioner, Bayer Health<br>Care Diabetes Care, Novo<br>Nordisk Pen Devices | None                                                                                                                                              |
| A.B.G. | None                                                                                                                               | Pending patents: JDP-106<br>(SAZ-T2D), JDP-109<br>(SAZ-CUD), JDP-129 (SRF)                                                                                                                                                                                                                                               | None                                                                                                                                                                                                                                                                                                                         | Special Government Employee, FDA<br>(invited participant for Endocrine and<br>Metabolic Advisory Committee)                                       |
| R.G.   | None                                                                                                                               | None                                                                                                                                                                                                                                                                                                                     | None                                                                                                                                                                                                                                                                                                                         | None                                                                                                                                              |
| J.L.   | Boehringer Ingelheim,<br>sanofi-aventis                                                                                            | None                                                                                                                                                                                                                                                                                                                     | None                                                                                                                                                                                                                                                                                                                         | Expert witness for variety of legal<br>firms. No cases involved in the last<br>12 months concerned drugs, devices,<br>or pharmaceutical companies |
| J.B.M. | ADA, Diabetes Research<br>Institute Foundation                                                                                     | None                                                                                                                                                                                                                                                                                                                     | Amgen                                                                                                                                                                                                                                                                                                                        | None                                                                                                                                              |
| A.L.M. | None                                                                                                                               | None                                                                                                                                                                                                                                                                                                                     | None                                                                                                                                                                                                                                                                                                                         | Clinical Science Chair, The Endocrine<br>Society Annual Meeting & Expo 2012                                                                       |
| J.R.M. | Roche (Creative Coaching<br>Workshop), VMS<br>(Steady Start Educator<br>Network), Healthy<br>Interactions                          | None                                                                                                                                                                                                                                                                                                                     | None                                                                                                                                                                                                                                                                                                                         | None                                                                                                                                              |
| R.H.R. | None                                                                                                                               | Co-inventor of GENIE. No<br>commercial agreements<br>or collaborations. (U.S.<br>patent application<br>number 12464344 filed<br>by VA Technology<br>Transfer Program, DC01-<br>#145823-v1-066072-<br>0050 Automated System<br>and Method of Diabetes<br>Control (Rao RH,<br>Perreiah PL,<br>Cunningham CA,<br>Inventors) | None                                                                                                                                                                                                                                                                                                                         | None                                                                                                                                              |
| A.R.   | Forest Laboratories*,<br>Abbott Laboratories,<br>Eli Lilly, Novo<br>Nordisk*, sanofi-<br>aventis*, Boehringer<br>Ingelheim, Amylin | None                                                                                                                                                                                                                                                                                                                     | sanofi-aventis*, Amylin                                                                                                                                                                                                                                                                                                      | Board Member and President, Appalachian<br>Diabetes Foundation                                                                                    |
| H.R.   | Eli Lilly*                                                                                                                         | None                                                                                                                                                                                                                                                                                                                     | Eli Lilly*, Roche Diagnostics                                                                                                                                                                                                                                                                                                | <i>Diabetes Forecast</i> , Associate Editor                                                                                                       |
| D.L.S. | None                                                                                                                               | None                                                                                                                                                                                                                                                                                                                     | None                                                                                                                                                                                                                                                                                                                         | None                                                                                                                                              |
| P.U.   | Eli Lilly                                                                                                                          | None                                                                                                                                                                                                                                                                                                                     | Eli Lilly, sanofi-aventis,<br>Halozyne Therapeutics,<br>Medtronic                                                                                                                                                                                                                                                            | <i>Clinical Diabetes</i> , Editorial Board                                                                                                        |
| C.W.   | Amylin Pharmaceuticals*,<br>Eli Lilly*, Merck, Novo<br>Nordisk*, sanofi-<br>aventis*, Boehringer<br>Ingelheim                      | None                                                                                                                                                                                                                                                                                                                     | Amylin Pharmaceuticals*,<br>Boehringer Ingelheim,<br>Johnson & Johnson,<br>sanofi-aventis*                                                                                                                                                                                                                                   | None                                                                                                                                              |
| J.F.   | None                                                                                                                               | None                                                                                                                                                                                                                                                                                                                     | None                                                                                                                                                                                                                                                                                                                         | None                                                                                                                                              |
| S.D.   | None                                                                                                                               | None                                                                                                                                                                                                                                                                                                                     | None                                                                                                                                                                                                                                                                                                                         | None                                                                                                                                              |
| S.K.   | None                                                                                                                               | None                                                                                                                                                                                                                                                                                                                     | None                                                                                                                                                                                                                                                                                                                         | None                                                                                                                                              |
